# Supplementary material for: Incidence and outcome of acquired aplastic anemia: real-world data from patients diagnosed in Sweden from 2000–2011
Source: PubMed Central journal article supplement — Haematologica. 2017 Jul 27;102(10):1683–90. doi: 10.3324/haematol.2017.169862 (PMC5622852; doi:10.3324/haematol.2017.169862), 2017-10
Supplement: 2017_169862-Disclosures_and_Contributions.pdf [file 2017_169862-Disclosures_and_Contributions.pdf]

Haematologica  
HAEMATOL/2017/169862  
Version 3

Incidence and outcome of acquired aplastic anemia—real-world data from patients diagnosed in Sweden from 2000—2011

Krista Vaht, Magnus Göransson, Kristina Carlson, Cecilia Isaksson, Stig Lenhoff, Anna Sandstedt, Bertil Uggla, Jacek Winiarski, Per Ljungman, Mats Brune, and Per-Ola Andersson

Disclosures: This study was supported by grants from ALF Västra Götaland, Gothenburg Medical Society, and a scholarship from Alexion Sweden. P-O. Andersson. joined the speakers bureau of Gilead, Janssen and Roche and has been a consultant for Abbvie. The remaining authors declare no competing financial interests.

Contributions: K.V., P.L., M.B., and P-O. A. conceived and designed the study; K.V. collected and assembled data; M.G., K.C., C.I., S.L., A.S., B.U., and J.W. provided thoughtful contributions and patient data; K.V. and P-O. A. analyzed and interpreted data; K.V. and P-O. A. wrote the manuscript; and all authors gave final approval of the manuscript.
